# Supplementary material
Source: publisher site journal article supplement (https://spandidos-publications.com/2665/downloadSupplementary)

Figure S1. Circ\_0000511 accelerates the proliferation, migration and invasion, and inhibits apoptosis partly through targeting miR-326. MCF-7 and MDA-MB-468 cells were transfected with the following four groups: si-NC, si-circ\_0000511, si-circ\_0000511 + anti-miR-NC or si-circ\_0000511 + anti-miR-326. (A) Colony formation assay was utilized to assess cell proliferation. (B) Apoptosis was assessed via flow cytometry. Representative images of Transwell (C) migration and (D) invasion assays (magnification, x100). circ\_0000511, circular RNA 0000511; BC, breast cancer; miR, microRNA; si, small interfering RNA; NC, negative control.

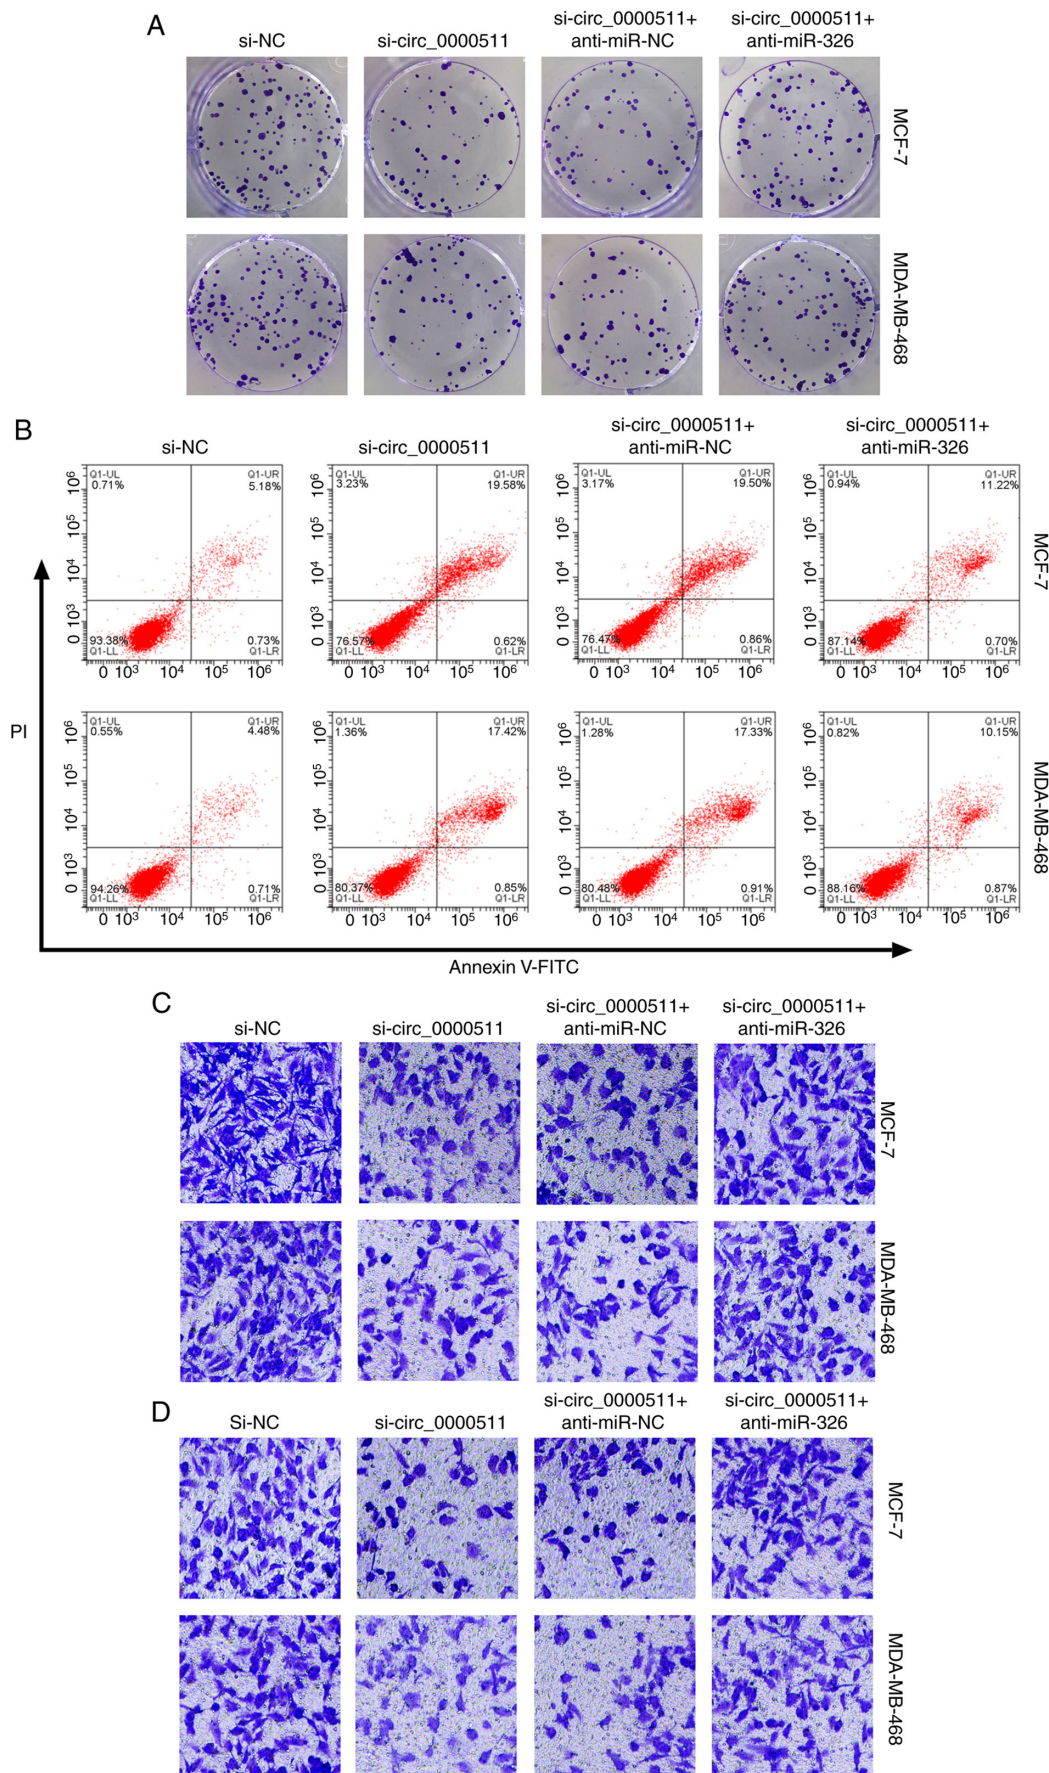

Figure S2. Overexpression efficiency of TAZ plasmid in BC cells. (A) mRNA and (B) protein expression levels of TAZ in BC cells transfected with pcDNA or TAZ plasmid were examined by reverse transcription-quantitative PCR or western blot assay, respectively. \* $P < 0.05$  vs. pcDNA. BC, breast cancer; TAZ, transcriptional co-activator with PDZ-binding motif.

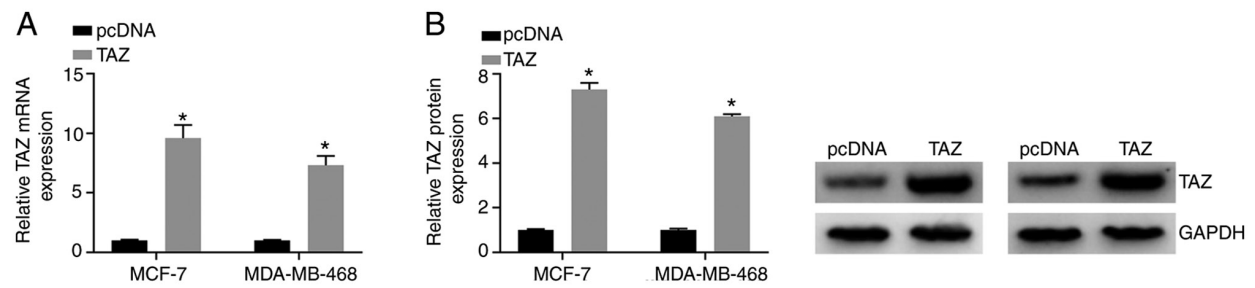



Figure S3. miR-326 overexpression suppresses the malignant phenotypes of BC cells partly through targeting TAZ. MCF-7 and MDA-MB-468 cells were transfected with miR-NC, miR-326, miR-326 + pcDNA or miR-326 + TAZ. (A) Cell proliferation was evaluated by colony formation assay. (B) Apoptosis was analyzed by flow cytometry. Representative images of Transwell (C) migration and (D) invasion assays (magnification, x100). miR, microRNA; NC, negative control; TAZ, transcriptional co-activator with PDZ-binding motif.

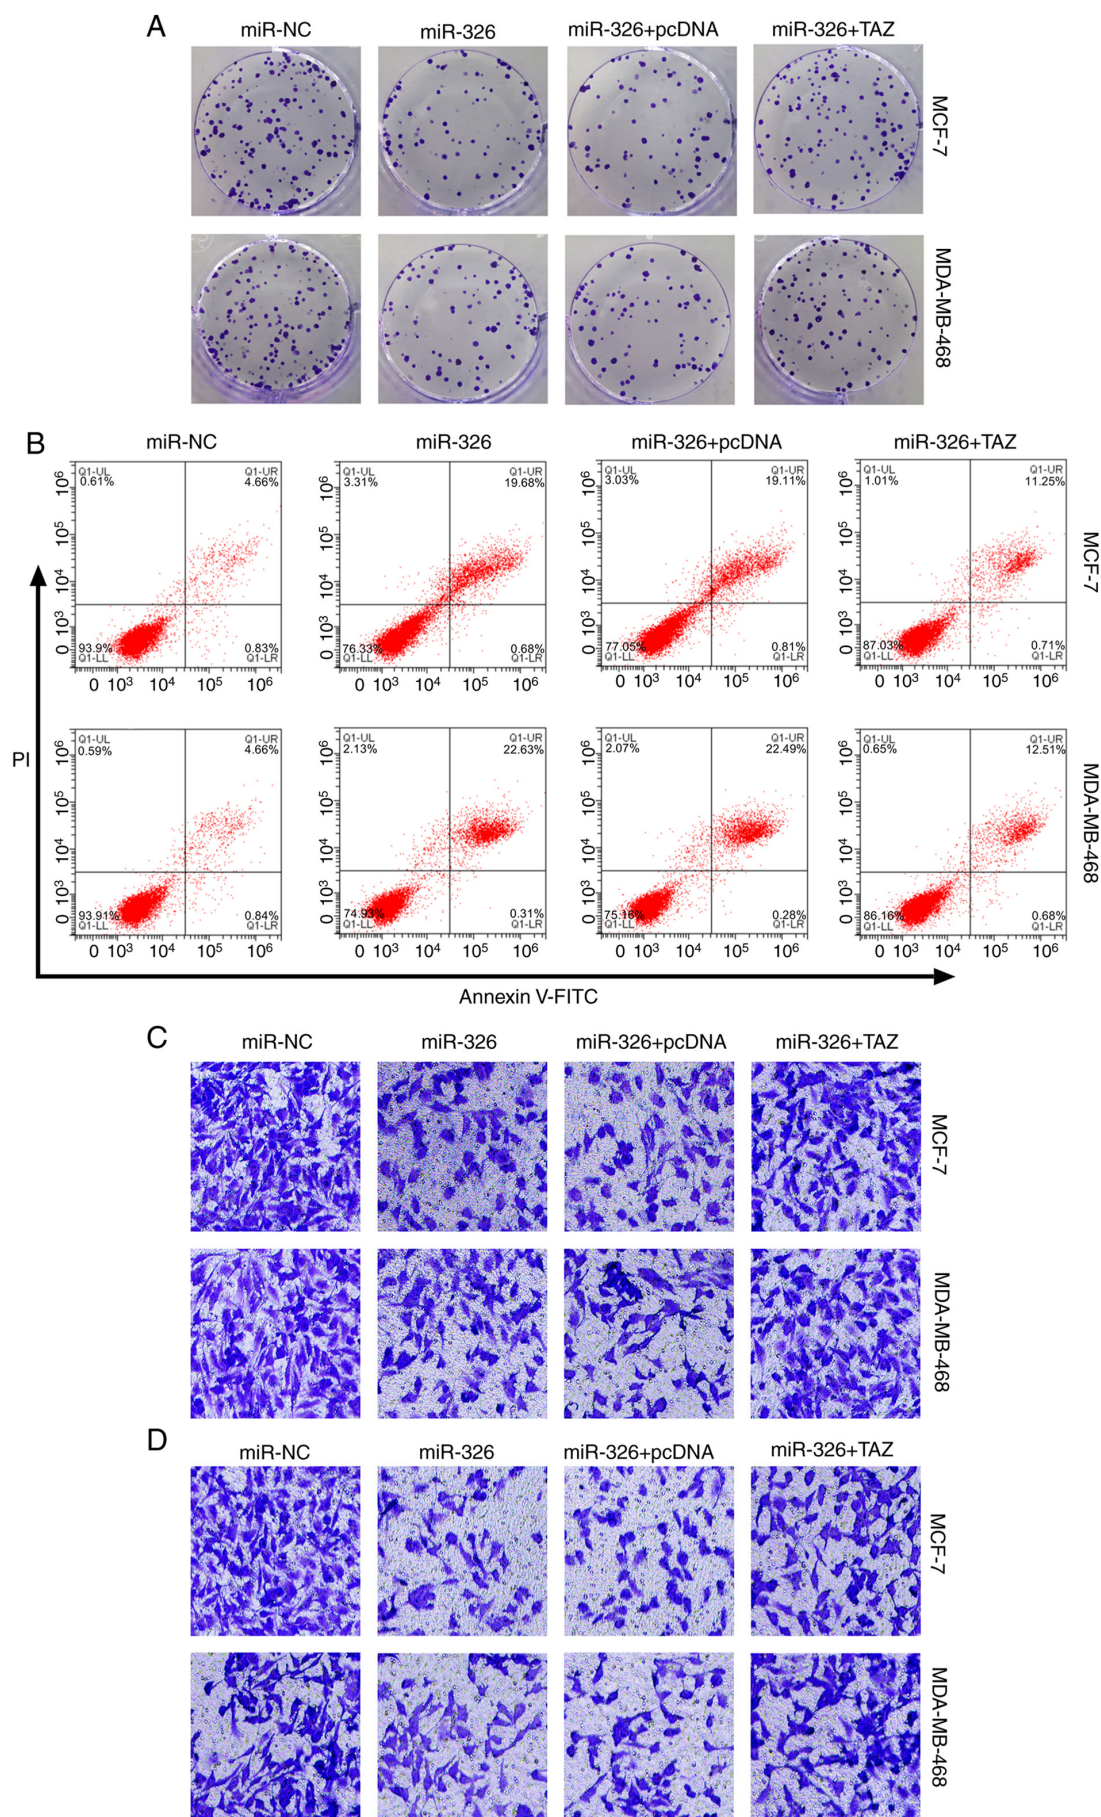

Supplement: Supplementary file 1 [file downloadSupplementary]
